# Supplementary material
Source: publisher site journal article supplement (https://www.dovepress.com/article/253628)
Supplement: Supplementary file 1 [file get_supplementary_file.php]

**Supplementary material**

Example of study patients with large angle sensory exotropia after lateral rectus muscle elongation by autograft from resected medial rectus muscle with improved adduction and abduction and stable results till six month follow up.

**Patient (1)**

| **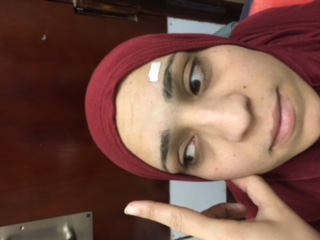**  **A** | **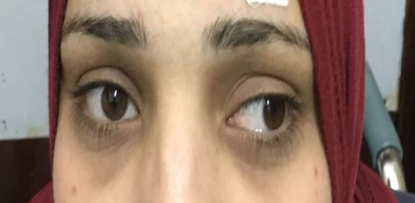**  B | **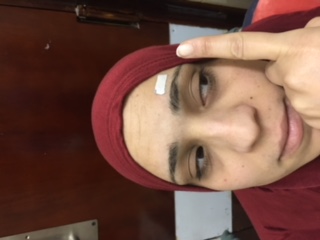**  **C** | **preoperative** |
| --- | --- | --- | --- |
|  | 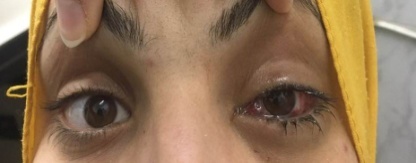  **D** |  | **1 day postoperative** |
| **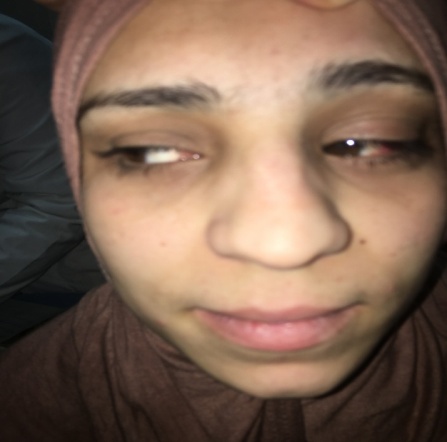**  **E** | **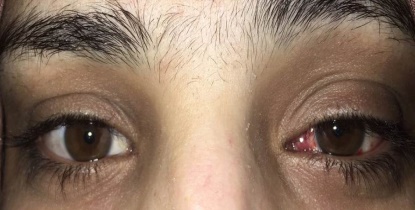F** | **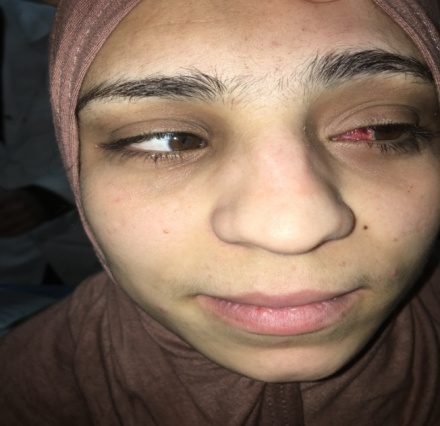**  **G** | **1week postoperative** |
|  | **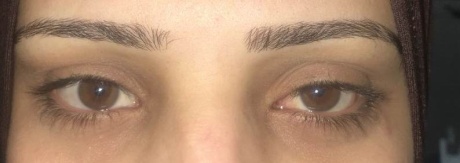**  **H** |  | **3 months**  **postoperative** |
| **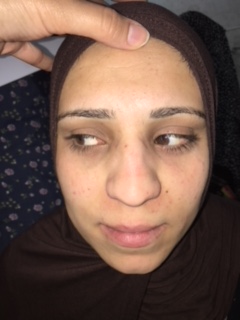**  **I** | **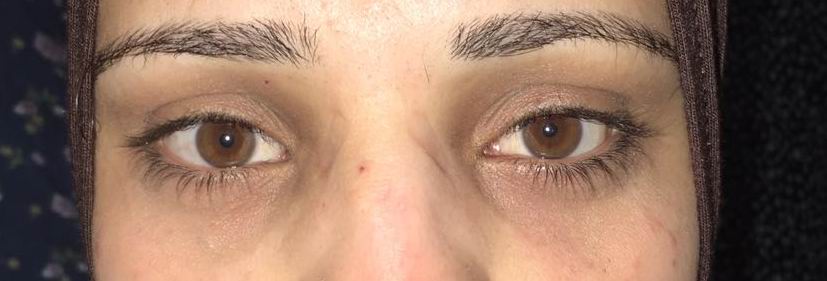**  **J** | **K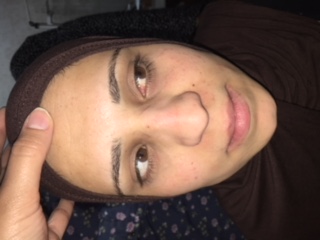** | **6months postoperative** |

**Patient (2)**

| **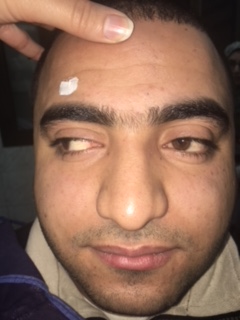**  **A** | **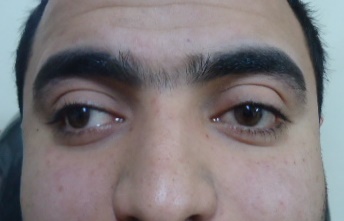**  **B** | **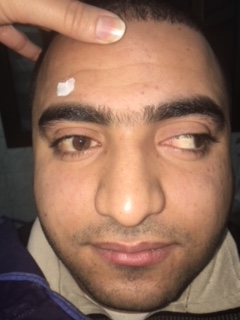**  **C** | **Preoperative** |
| --- | --- | --- | --- |
|  |  |  |  |
| 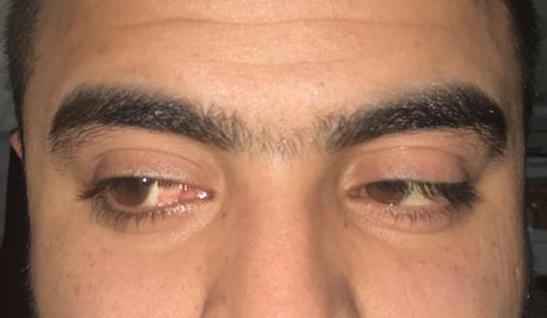  **D** | 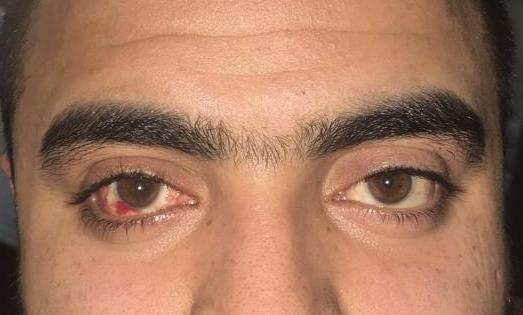  **E** | 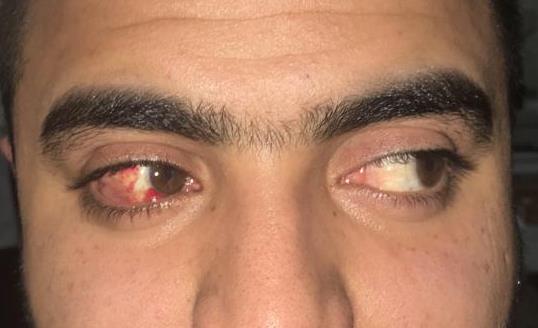  **F** | **1 week follow up** |
|  |  |  |  |
| 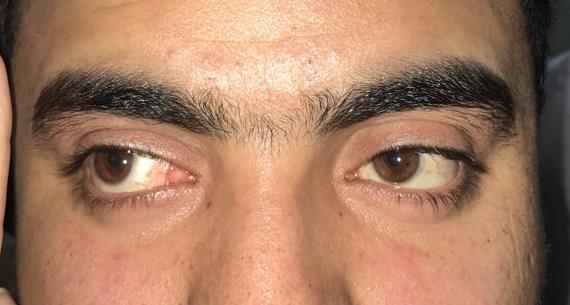  **G** | 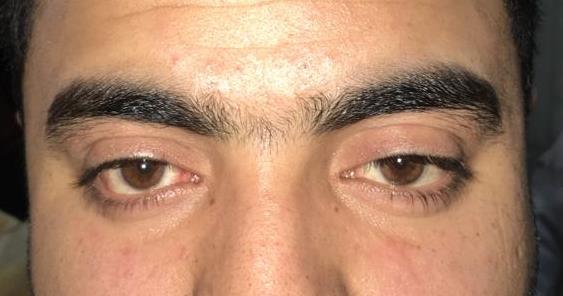  **H** | 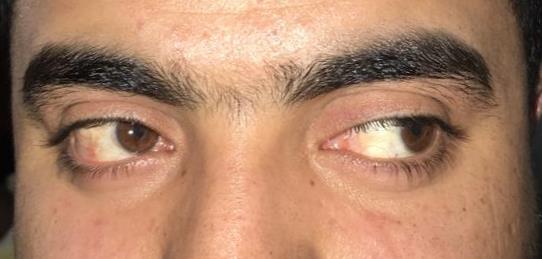  **I** | **6 months follow up** |

| 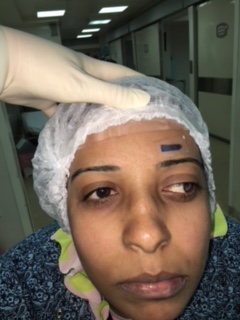  **A** | 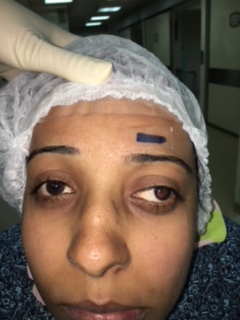  **B** | 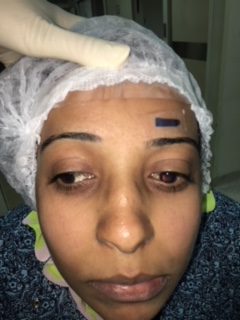  **C** | **Preoperative** |
| --- | --- | --- | --- |
|  |  |  |  |
| 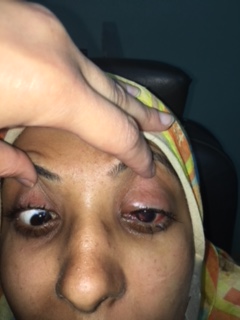  **D** | 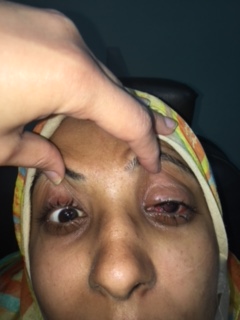  **E** | 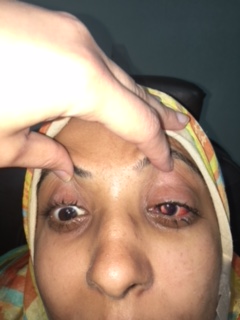  **F** | **1 day postoperative** |
|  |  |  |  |
| 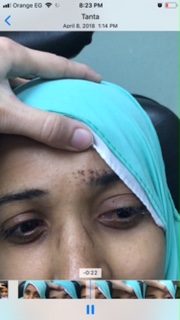  **G** | 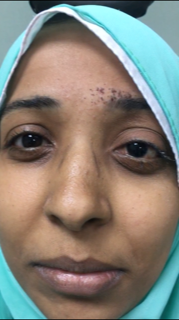  **H** | 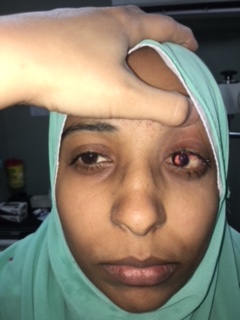  **I** | **3 months postoperative** |
|  |  |  |  |
| **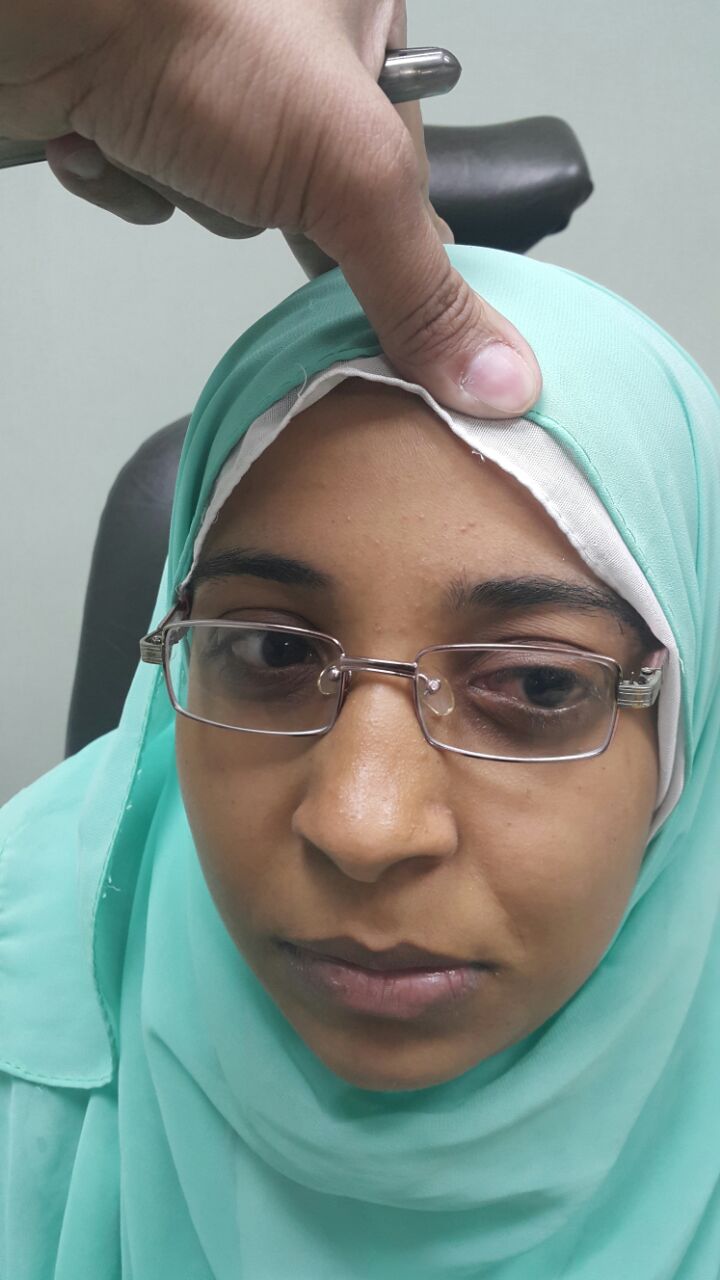**  **J** | 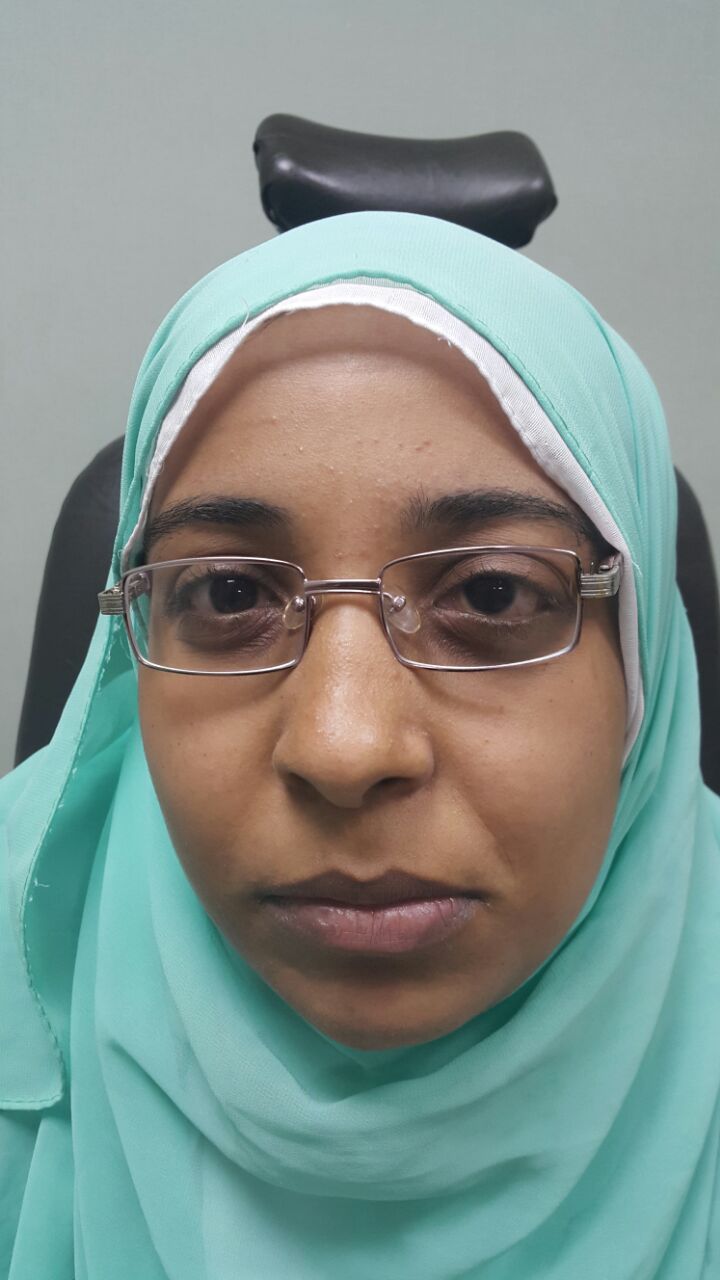  **K** | **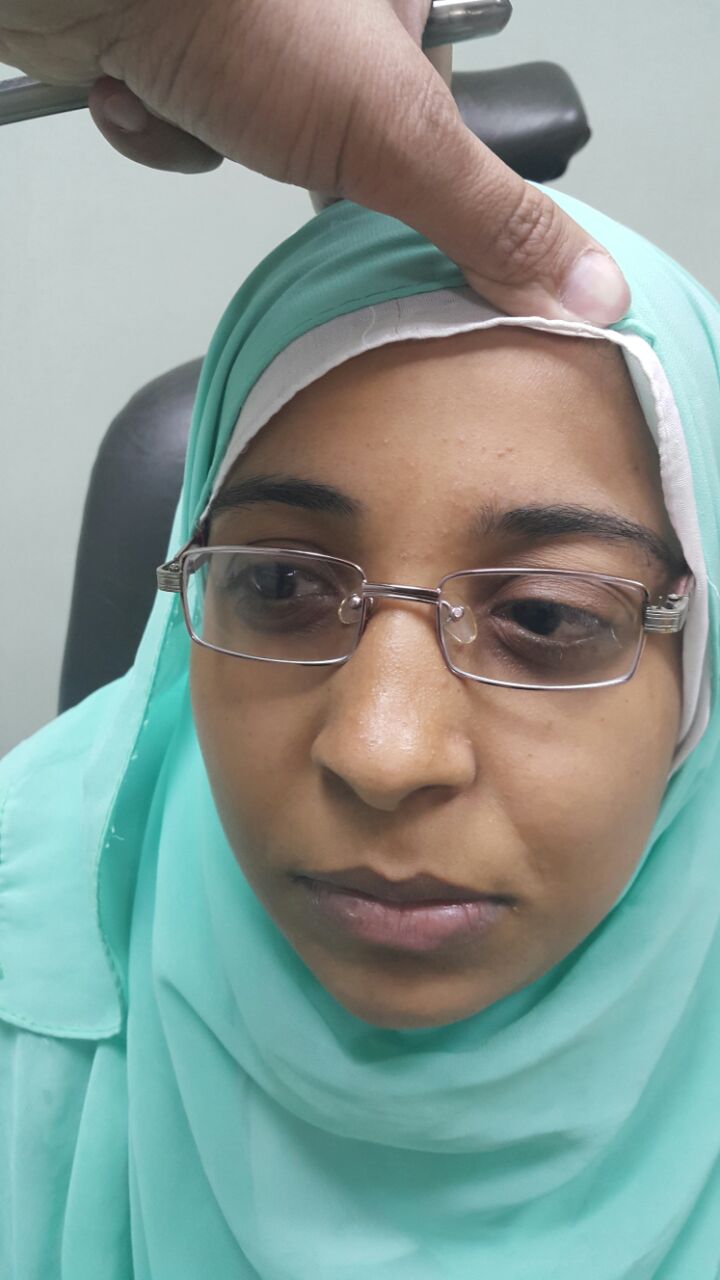**  **L** | **6 months postoperative** |

**Patient (3)**
